# Supplementary material for: Host Soluble Factors Cause Changes in Staphylococcus epidermidis Antibiotic Susceptibility and Biofilm Formation Ability
Source: MDPI journal article supplement (doi:10.3390/pathogens12081064), 2023-08-19
Supplement: s1 [file s1]

# Host soluble factors cause changes in *Staphylococcus epidermidis* antibiotic susceptibility and biofilm formation ability

Fernando Oliveira <sup>1</sup>, Vânia Gaio <sup>1</sup>, Susana Brás<sup>1</sup>, Sofia Oliveira <sup>1</sup> and Angela França <sup>1,2,\*</sup>

<sup>1</sup> Centre of Biological Engineering, LIBRO - Laboratory of Research in Biofilms Rosário Oliveira, University of Minho, Campus de Gualtar, 4710-057, Braga, Portugal

<sup>2</sup> LABBELS – Associate Laboratory, Guimarães/Braga, Portugal

\* Correspondence: afranca@ceb.uminho.pt

## Supplementary figures

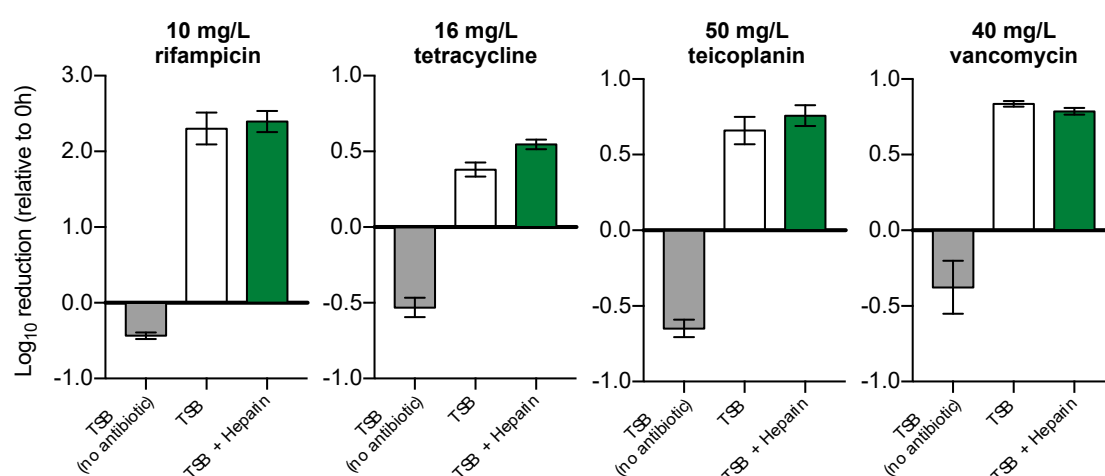

**Figure S1. Effect of heparin on the activity of the antibiotics tested.** Reduction in the CFU counts of *S. epidermidis* RP62A grown in the presence of heparin upon 3 hours of incubation with rifampicin, tetracycline, teicoplanin, and vancomycin at their respective peak serum concentration (PSC). Data are represented as mean  $\pm$  SEM (n = 3-4). One-way ANOVA with Dunnett's multiple comparisons test found no differences between TSB and TSB plus heparin.

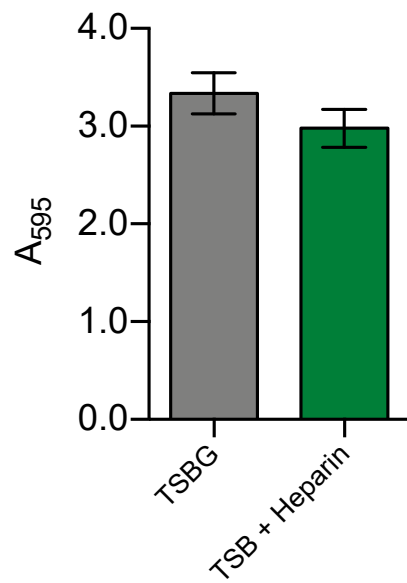

**Figure S2. Effect of heparin on *S. epidermidis* biofilm formation.** Data are represented as mean  $\pm$  SEM (n = 5). One-way ANOVA with Dunnett's multiple comparisons test found no significant differences between TSB and TSB plus heparin.

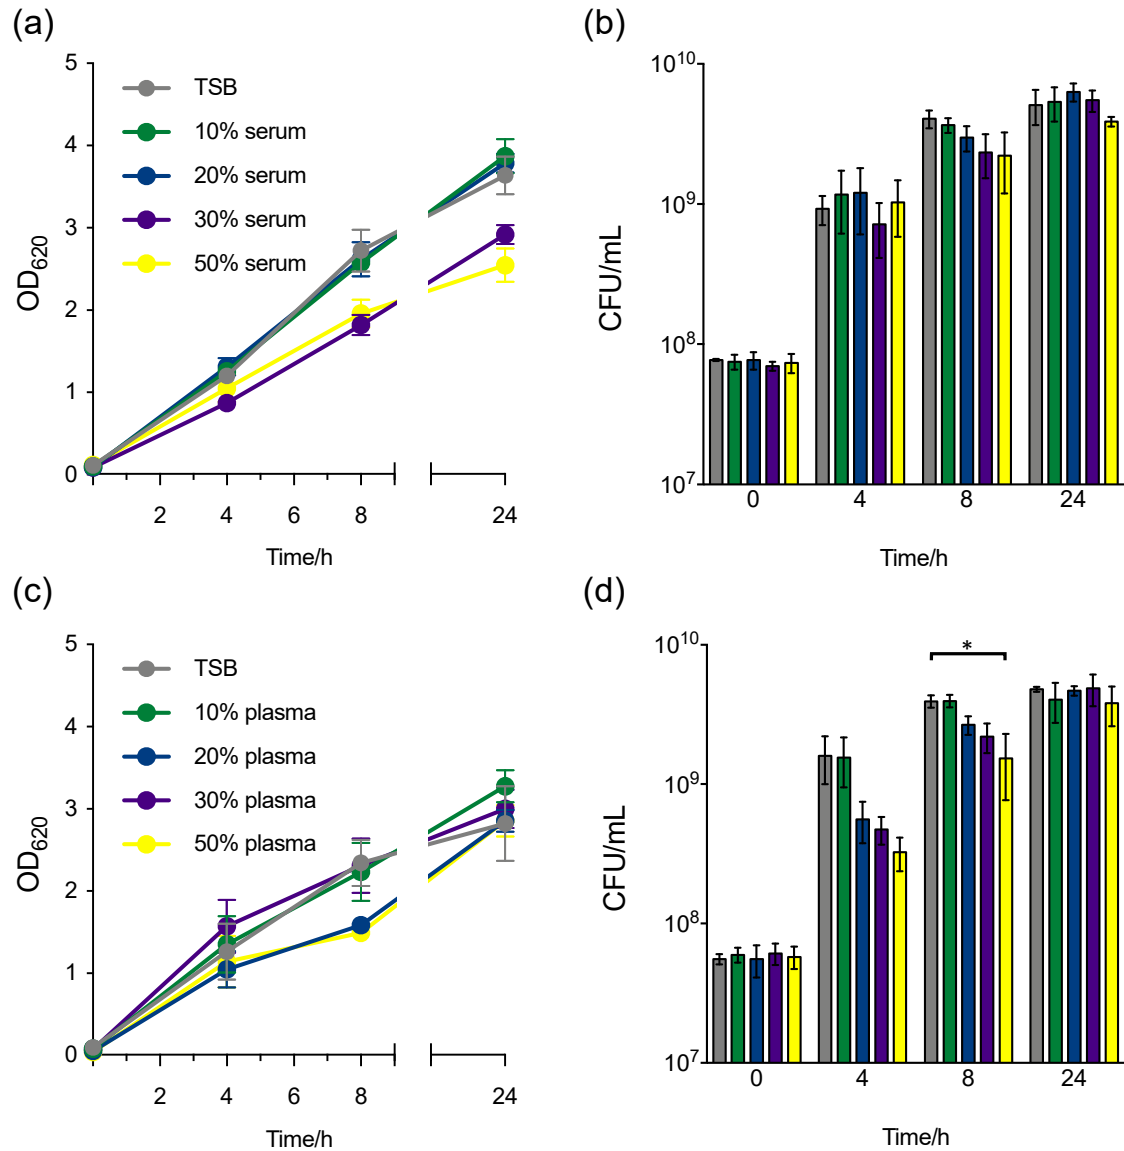

**Figure S3. Effect of human serum and plasma on *S. epidermidis* growth.** Bacteria were grown in conical flasks for 24 h at 37°C, 120 rpm in serum (a and b)- or plasma (c and d)- enriched TSB and growth was monitored regarding OD<sub>620</sub> (a and c) and CFU counts (b and d). Data are represented as mean  $\pm$  SEM (n = 3). Significant differences were determined by two-way ANOVA with Dunnett's multiple comparisons tests. \*P < 0.05 vs TSB.

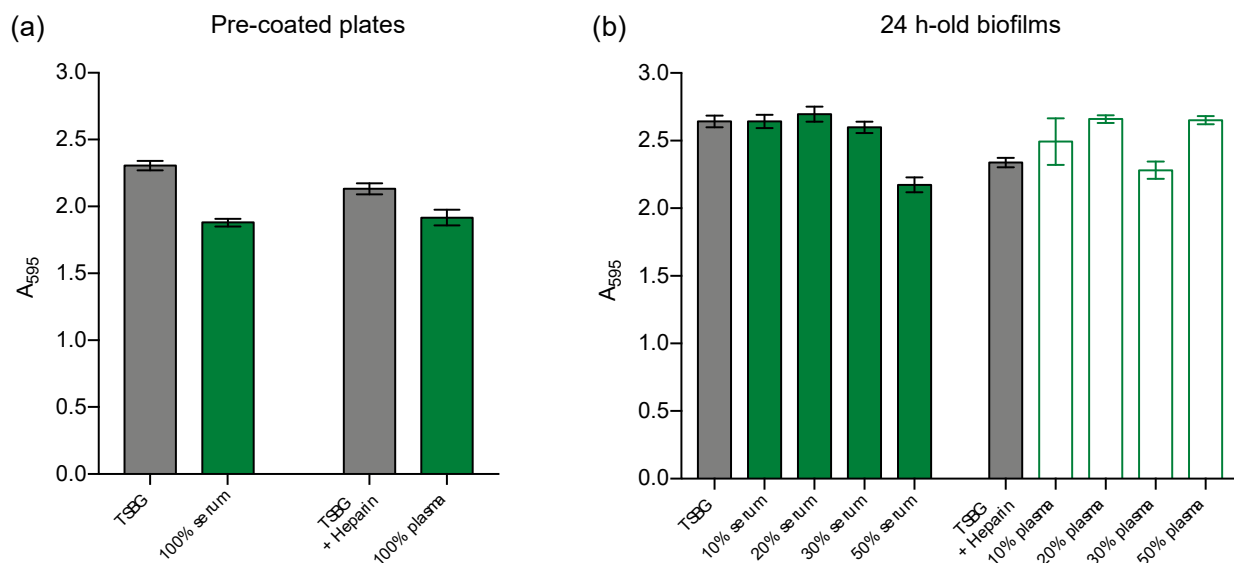

**Figure S4. Effect of human serum and plasma at different stages of biofilm formation.** (a) Biofilm formation on microplates pre-coated with human serum/ plasma; (b) Effect of human serum/plasma on 24 h-old biofilms. Data represent the mean  $\pm$  SEM of 6 technical replicates from a single experiment.

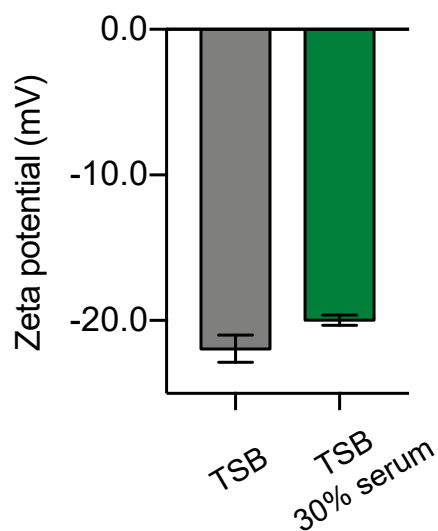

**Figure S5. Effect of human serum on the bacterial surface charge.** Data represent the mean  $\pm$  SEM of 10 zeta potential measurements from a single experiment.

## Supplementary tables

**Table S1.** List of primers used in this study.

| Target gene | Forward sequence (5' - 3') | Reverse sequence (5' - 3') | Product size (bp) | Efficiency (%) |
|-------------|----------------------------|----------------------------|-------------------|----------------|
| <i>16S</i>  | GGGCTACACACGTGCTACAA       | GTACAAGACCCGGAACGTA        | 176               | 91.0           |
| <i>gyrB</i> | GCATTGTTGACGGGTATTGG       | CATCAACATCGGCATCAGTC       | 88                | 101.5          |
| <i>atlE</i> | GTAGATGTTGTGCCCCAAGG       | ACCTGATAGCGCTGAAAACG       | 201               | 98.5           |
| <i>embp</i> | ATCGCAGCAAGTACATCCACCA     | ATATTCTGTTGCATCCGCACGA     | 112               | 102.9          |
| <i>gehD</i> | AATCGAGCGCTTTAGTTCC        | TGGTGGTACGGTATCCGATT       | 176               | 103.1          |
| <i>sdrG</i> | GGACGATTACACGACGATACAGCA   | GAGGCAAGTCACCTTGTCCTTGA    | 140               | 98.0           |
| <i>sepA</i> | TCTTAAGGCATCTCCGCCTA       | GTCTGGTGCGAATGATGTTG       | 196               | 89.0           |
| <i>sspA</i> | GTGGCTAATGGTTTGTACCC       | TCCTAATGGCAAATTTGTGG       | 201               | 105.1          |
| <i>dltA</i> | ACACATATGGACCAACTGAAGCTA   | CCTCAATGACAAGTTCTCCTTCTT   | 150               | 94.0           |
| <i>fntC</i> | CGCCCTCATCATAGCATTG        | CCAATTGGATCACCCAAAAC       | 182               | 103.8          |

**Table S2.** List of antibiotics used in this study

| Antimicrobial agent | Class            | Mechanism of action               |
|---------------------|------------------|-----------------------------------|
| Dicloxacillin       | $\beta$ -lactams | Inhibition of cell wall synthesis |
| Rifampicin          | Rifamycins       | Inhibition of RNA synthesis       |
| Teicoplanin         | Glycopeptides    | Inhibition of cell wall synthesis |
| Tetracycline        | Tetracyclines    | Inhibition of protein synthesis   |
| Vancomycin          | Glycopeptides    | Inhibition of cell wall synthesis |

**Table S3.** MIC ranges (in mg/L) of five antimicrobial agents for *S. epidermidis* RP62A in the presence of human serum and plasma. TSBH, TSB supplemented with heparin ( $n = 3-4$ )

| Antimicrobial agent | TSB   | Human serum |             |             | TSBH        | Human plasma |       |             |
|---------------------|-------|-------------|-------------|-------------|-------------|--------------|-------|-------------|
|                     |       | 10%         | 20%         | 30%         |             | 10%          | 20%   | 30%         |
| Dicloxacillin       | 4-8   | 4           | 2-4         | 2-4         | 2           | 2            | 2     | 2-4         |
| Rifampicin          | 0.004 | 0.008       | 0.008-0.016 | 0.008-0.031 | 0.002-0.004 | 0.008        | 0.008 | 0.008-0.016 |
| Teicoplanin         | 1-4   | 2-4         | 2-4         | 2-4         | 1-2         | 2-4          | 2-4   | 4           |
| Tetracycline        | 0.25  | 0.25        | 0.25        | 0.125-0.25  | 0.25        | 0.25         | 0.25  | 0.25-0.5    |
| Vancomycin          | 2-4   | 2           | 2-4         | 2           | 2           | 2            | 2     | 2           |

**Table S4.** MBC ranges (in mg/L) of five antimicrobial agents for *S. epidermidis* RP62A in the presence of human serum and plasma. TSBH, TSB supplemented with heparin ( $n = 3-4$ )

| Antimicrobial agent | TSB       | Human serum     |          |                 | TSBH      | Human plasma    |                 |                         |
|---------------------|-----------|-----------------|----------|-----------------|-----------|-----------------|-----------------|-------------------------|
|                     |           | 10%             | 20%      | 30%             |           | 10%             | 20%             | 30%                     |
| Dicloxacillin       | $\geq 64$ | $\geq 64$       | $> 64$   | $> 64$          | $> 2$     | $> 64$          | $> 64$          | $> 64$                  |
| Rifampicin          | 0.16      | 0.031-<br>0.063 | 0.031    | 0.031-<br>0.063 | 0.008     | 0.031-<br>0.063 | 0.031-<br>0.063 | 0.031 - $\geq$<br>0.063 |
| Teicoplanin         | 4         | $\geq 8$        | $\geq 8$ | $\geq 8$        | 4 - $> 8$ | $> 8$           | $\geq 8$        | $\geq 8$                |
| Tetracycline        | 0.5-<br>4 | $> 4$           | $> 4$    | $> 4$           | $> 4$     | $> 4$           | $> 4$           | $> 4$                   |
| Vancomycin          | $> 8$     | $\geq 8$        | $> 8$    | $\geq 8$        | 8         | 4 - $> 8$       | 4 - $> 8$       | 4 - $\geq 8$            |
